# Supplementary material
Source: publisher site journal article supplement (https://www.dovepress.com/article/375745)
Supplement: Supplementary file 1 [file get_supplementary_file.php]

Table S1 - Example Database Search Strategy

| Disease/Condition Terminology | Diabetes Mellitus"[Mesh] OR "diabetes mellitus”[Title/Abstract] OR “t2dm”[Title/Abstract] OR “NIDDM”[Title/Abstract] OR “type 2 diabetes” [Title/Abstract] |
| --- | --- |
| Included Search Terminology | persisten* OR ("Patient Compliance") Or ("Patient compliance" OR "User compliance" OR "patient adherence" OR "treatment adherence" OR "Patient adherence" OR "Patient cooperation" OR "Patient non adherence" OR "Patient non compliance" OR "Patient nonadherence" OR "Patient non-adherence" OR "Family planning clinic attendance" OR "Patient noncompliance" OR "Patient non-compliance" OR "adherence to therapy" OR "adherence to treatment" OR "compliance to therapy" OR "compliance to treatment" OR "therapy adherence" OR "therapy compliance" OR "treatment adherence" OR "treatment compliance" OR "dosage adherence" OR "dosage compliance" OR "dose adherence" OR "dose compliance" OR "dosing adherence" OR "dosing compliance" OR "drug adherence" OR "drug compliance" OR "drug intake compliance" OR "drug regimen adherence" OR "drug regimen compliance" OR "medication adherence" OR "medication intake adherence" OR "adherence to pharmacotherap*" OR "compliance with pharmacotherap*")  (patient reported*) or patient-report* or self-report* (Questionnaires OR interview) or (instrument* OR scale* OR Questionnaire* OR measure* OR methods OR outcome measurement* OR (test OR tests)) or tool* or survey* or PROM* |
| Publication Type | Review/Systematic Review |
| Publication Date | No origin date set - 2021 |
| Population | Human - Adult |

Table S2 - Validity assessment of PROMs

| **SR No.** | **No. studies (n)** | **No. PROMs (n)** | **Identified PROMs (n)** | **PROMs without validity (n, %)** | **Exclusion Reasons (n)** |
| --- | --- | --- | --- | --- | --- |
| 1 | 18 | 19 | MMAS-4 (9), MMAS-4-German (1)a, MMAS-4-Korean (1), MMAS-8 (1), MARS-10-Persian (1) a, MMAS-8 Arabic (1), MTA-Arabic (1)a, SDSCA-MS (1), Girerd Questionnaire (1)b, MCQ (1)c, CRN (1) | 5 (26.3) | Language (3)  Target condition (1)  Language not defined (1) |
| 2 | 31 | 32 | MMAS-8-Malay (2), MMAS-4-German (1) a, MMAS-8-Arabic (2), CRN (1), CRN-Spanish (1) a, CRN-Vietnamese (1) a, MMAS-4-Spanish (2), MMAS-4 (9), MMAS-8 (2), MARS-5-Dutch (2) a, BrMQ (2), SDSCA-5 (1), MARS-10-Persian (1) a, MARS-5 (2), ARMS-12 (1), MMAS-4-French (1) a, MMAS-8-Persian (1) | 7 (21.9) | Language (7) |
| 3 | 9 | 4 | MMAS-8-Arabic (1), MMAS-8-French (1), MMAS-8-Ewe (1), MMAS-8 (1), | 0 |  |
| 4 | 7 | 7 | MMAS-4 (3), BrMQ (1), MARS-5 (1), DSAS-Chinese (1), SDSCA-Revised (1) | 0 |  |
| 5 | 1 | 1 | MMAS-4 (1) | 0 |  |
| 6 | 14 | 11 | MTA-Arabic (2) a, MMAS-8-Arabic (4), MMAS-4-Arabic (1), MMAS-8-Thai (1), SDSCA-11-Persian (1), MARS-10-Farsi (2) a | 4 (36.4) | Language (4) |
| 7 | 5 | 4 | MARS-5-Chinese (1), MARS-5-Portuguese (1), MMAS-8-Arabic (1), MARS-5-Arabic (1) | 0 |  |
| 8 | 4 | 3 | BrMQ-Kannada (1) a, MMAS-4-Portuguese (1) a, 2-item-Haynes (1)b | 3 (100.0) | Language (2)  Target condition (1) |
| 9 | 15 | 14 | MMAS-8 (2), SDSCA-MS (1), MMAS-4 (3), MARS-5 (2), SDSCA-Revised (2), MMAS-8-Spanish (1)a, MTA-Portuguese (1), BrMQ (1), RAM Scale (1) | 1 (7.1) | Language (1) |
| 10 | 5 | 7 | SDSCA-Revised (2), SDSCA-Revised-Spanish (2) a, Hill-Bone Compliance Scale (1) b, modified-BrMQ (1) b, MMAS-8 (1) | 4 (57.1) | Language (2)  Target condition (2) |
| 11 | 12 | 11 | MMAS-8 (2), MMAS-8-Spanish (1) a, MARS-5 (2), Hill-Bone Compliance Scale (2) b, MMAS-4-Arabic (1), BrMQ (1), MMAS-8-Persian (1), Edwards-Regimen Adherence Score (1) | 3 (27.3) | Language (1)  Target condition (2) |
| 12 | 11 | 13 | ARMS (1), ARMS-D (1), ASK-12 (1), ASK-20 (3), MMAS-4 (2), MMAS-4-Chinese (1), MMAS-8-Malay (1), MMAS-8-Korean (1), MMAS-8-Thai (1), VAS (1), | 0 |  |
| 13 | 16 | 20 | MMAS-8 (Ethiopia) (2) C, MMAS-8 (4), MMAS-8 (Tanzania) (1) c, MTA (1) a, SCI-Urdu (1), MMAS-8-Arabic (2), MMAS-4-Ga (1) a, MMAS-4-Twi (1) a, MMAS-4-Ewe (1) a, MTA-Portuguese (1), MMAS-8-Chinese (1), MMAS-8-Amharic (2) a, MMAS-8-Afan Oromo (2) a | 11 (55.0) | Language not defined (3) Language (8) |
| 14 | 2 | 2 | MMAS-4-Spanish (1) a, BrMQ (1) | 1 (50.0) | Language (1) |
| 15 | 5 | 5 | MMAS-8-Malay (3), MMAS-4-Turkish (1) a, MMAS-8-Farsi (1) | 1 (20.0) | Language (1) |
| 16 | 4 | 6 | MMAS-8-Malay (1), MMAS-8 (1), MMAS-4 (3), MMAS-4-Chinese (1) | 0 |  |
| 17 | 26 | 31 | MMAS-4-Afan Oromo (1) a, MMAS-8-Kannada (1) a, MMAS-4-Khmer (1), MMAS-8-Tamil (1) a, MMAS-8-Tigrigna (1) a, MTA-Arabic (1) a, MMAS-8-Amharic (4) a, SDSCA-Revised-Amharic (2), MMAS-8 (3), MMAS-8-Indonesian (1), MMAS-4-Amharic (5) a, MMAS-8-Arabic (3), MCQ (1), SDSCA-Revised-Hindi (1) a, MMAS-4-Malayam (1) a, MMAS-8-Malay (1), MMAS-8-Mandarin (1), MMAS-4-Arabic (1), MMAS-8-Afan Oromo (1) a | 17 (54.8) | Language (17) |
| 18 | 35 | 36 | AACTG (1) b, ARMS (1), ARMS-7-Turkish (1), ASK-12 (1), ASK-20 (2), BrMQ-Thai (1), GATM-French (1), GMAS-Urdu (1), GMAS-English (2), IADMAS-Arabic (1), MAS-12-Japanese (1), MMAS-4 (2), MMAS-4-Indonesian (1), MMAS-4-Chinese (1), MMAS-4-French (1), MMAS-8-Arabic (1), MMAS-8 (1), MMAS-8-Persian (1), MMAS-8-Thai (1), MMAS-8-French (2), MIAS-8 (1), MNPS (1), PT/PP (1), SCI-Urdu (1), SCI-Spanish (1), SCI-Catalan (1), SDSCA-MS (2), Voils-English (1), Voils-Chinese (1), Voils-Malay (1), Demirtas-Turkish (1) | 1 (2.8) | Target condition (1) |
| 19 | 21 | 21 | SDSCA-Revised (1), SDSCA-Revised-Turkish (1), SCI-R (1), D-SMART-Spanish (1), V-DSMI (1), DSMB-O (1), SMP-T2D (1), Demirtas (1), MMAS-4-Thai (1), MMAS-4 (1), MMAS-4-Chinese (1), MMAS-8-Korean (1), MMAS-8-Chinese (1), MMAS-8-French (2), MMAS-4-Indonesian (1), MALMAS (1), MAT-OAD (1), MAT-Insulin (1), ARMS-K (1), GATM-French (1) | 0 |  |

Notes: aNo evidence provided for validity of PROM in target language; bNo evidence provided for validity of PROM in type 2 diabetes cohort; cLanguage not defined – Language of original PROM is discordant from expected language of patient cohort

Abbreviations: MMAS-4, Morisky medication adherence scale 4-item; MMAS-4-German, Morisky medication adherence scale 4-item German version; MMAS-4-K, Morisky medication adherence scale 4-item Korean version; MMAS-8, Morisky medication adherence scale 8-item; MARS-10-Persian, medication adherence rating scale 10-item Persian version; MMAS-8 Arabic, Morisky medication adherence scale 8-item Arabic version; MTA-Arabic, measurement of treatment adherence Arabic version; SDSCA-MS, summary of diabetes self-care activities medicines subscale; MCQ, medication compliance questionnaire; CRN, cost-related non-adherence; MMAS-8-Malay, Morisky medication adherence scale 8-item Malay version; MMAS-8-Arabic, Morisky medication adherence scale 8-item Arabic version; CRN-Spanish, cost-related non-adherence Spanish version; CRN-Vietnamese, cost-related non-adherence Vietnamese version, MMAS-4-Spanish, Morisky medication adherence scale 4-item Spanish version; MARS-5-Dutch, medication adherence rating scale 5-item Dutch version; BrMQ, brief medication questionnaire; SDSCA-5, summary of diabetes self-care activities 5-item; MARS-5, medication adherence rating scale 5-item; ARMS-12, adherence to refills and medications scale 12-item; MMAS-4-French, Morisky medication adherence scale 4-item French version; MMAS-8-Persian, Morisky medication adherence scale 8-item Persian version; MMAS-8-French, Morisky medication adherence scale 8-item French version; MMAS-8-Ewe, Morisky medication adherence scale 8-item Ewe version, DSAS-Chinese, disease-specific adherence scale Chinese version; SDSCA-Revised, summary of diabetes self-care activities revised version; MMAS-4-Arabic, Morisky medication adherence scale 4-item Arabic version; MMAS-8-Thai, Morisky medication adherence scale 8-item Thai version; SDSCA-11-Persian, summary of diabetes self-care activities 11-item Persian version; MARS-10-Farsi, medication adherence rating scale 10-item Farsi version; MARS-5-Chinese, medication adherence rating scale 5-item Chinese version; MARS-5-Portuguese, medication adherence rating scale 5-item Portuguese version; MARS-5-Arabic, medication adherence rating scale 5-item Arabic version; BrMQ-Kannada, brief medication questionnaire Kannada version; MMAS-4-Portuguese, Morisky medication adherence scale 4-item Portuguese version; MMAS-8-Spanish, Morisky medication adherence scale 8-item Spanish version, MTA- Portuguese, measurement of treatment adherence Portuguese version; RAM Scale, reported adherence to medication scale; SDSCA-Revised-Spanish, summary of diabetes self-care activities revised Spanish version; modified-BrMQ, modified brief medication questionnaire; ARMS, adherence to refills and medications scale; ARMS-D, adherence to refills and medications scale diabetes version; ASK-12, adherence starts with knowledge 12-item; ASK-20, adherence starts with knowledge 20-item; MMAS-4-Chinese, Morisky medication adherence scale 4-item Chinese version; MMAS-8-Korean, Morisky medication adherence scale 8-item Korean; VAS, visual analogue scale; MMAS-8 (Ethiopia), Morisky medication adherence scale 8-item Ethiopian version; MMAS-8 (Tanzania), Morisky medication adherence scale 8-item Tanzanian version; SCI-Urdu, self-care inventory Urdu version; MMAS-4-Ga, Morisky medication adherence scale 4-item Ga version; MMAS-4-Twi, Morisky medication adherence scale 4-item Twi version; MMAS-4-Ewe, Morisky medication adherence scale 4-item Ewe version; MMAS-8-Amharic, Morisky medication adherence scale 8-item Amharic version; MMAS-8-Afan Oromo, Morisky medication adherence scale 8-item Afan Oromo version; MMAS-4-Turkish, Morisky medication adherence scale 4-item Turkish version; MMAS-8-Farsi, Morisky medication adherence scale 8-item Farsi version; MMAS-4-Afan Oromo, Morisky medication adherence scale 4-item Afan Oromo version; MMAS-8-Kannada, Morisky medication adherence scale 8-item Kannada version; MMAS-4-Khmer, Morisky medication adherence scale 4-item Khmer version; MMAS-8-Tamil, Morisky medication adherence scale 8-item Tamil version; MMAS-8-Tigrigna, Morisky medication adherence scale 8-item Tigrigna version; SDSCA-Revised-Amharic, summary of diabetes self-care activities revised Amharic version; MMAS-8-Indonesian, Morisky medication adherence scale 8-item Indonesian version; MCQ, medication compliance questionnaire; SDSCA-Revised-Hindi, summary of diabetes self-care activities revised Hindi version; MMAS-4-Malayam, Morisky medication adherence scale 4-item Malayalam version; MMAS-8-Mandarin, Morisky medication adherence scale 8-item Mandarin version; AACTG, adult AIDS clinical trial group; ARMS-7-Turkish, adherence to refills and medications scale 7-item Turkish version; BrMQ-Thai, brief medication questionnaire Thai version; GATM-French, general adherence to medication French version; GMAS-Urdu, general medication adherence scale Urdu version; GMAS-English, general adherence to medication scale English version; IADMAS-Arabic, Iraqi anti-diabetic medication adherence scale Arabic version; MAS-12-Japanese, medication adherence scale 12-item Japanese version; MIAS, Morisky medication adherence scale adapted to specify insulin adherence; MNPS, medication non-persistence scale; PT/PP, number of pills taken/pills prescribed; SCI-Spanish, self-care inventory Spanish version; SCI-Catalan, self-care inventory Catalan version; SDSCA-Revised-Turkish, summary of diabetes self-care activities revised Turkish version; SCI-R, self-care inventory revised; D-SMART-Spanish, diabetes self-management assessment report tool Spanish version; V-DSMI, Vietnamese version of the diabetes self-management instrument; DSMB-O; diabetes self-management behaviour for older Koreans; SMP-T2D, self-management profile for type 2 diabetes; MALMAS, Malaysian medication adherence scale; MAT-OAD, measurement of adherence to drug therapy in diabetes mellitus–oral antidiabetics; MAT-Insulin, measurement of adherence to drug therapy in diabetes mellitus–insulin; ARMS-K, adherence to refills and medications scale Korean version

Table S3 – PROMs with associated translations and/or adaptations

| PROMs | Adaptations |
| --- | --- |
| ARMS | ARMS-7-Turkish  ARMS-12  ARMS-D  ARMS-K |
| ASK-12 | ASK-20 |
| BrMQ | BrMQ-Thai  Modified-BrMQ |
| CRN | CRN-Spanish  CRN-Vietnamese |
| Demirtas | Demirtas-Turkish |
| GMAS | GMAS-Urdu |
| MARS-5 | MARS-5-Arabic  MARS-5-Dutch  MARS-5-Portugese  MARS-10-Farsi  MARS-5-Chinese  MARS-10-Persian |
| MTA-Portuguese | MTA-Insulin  MTA-OAD  MTA-Arabic |
| MMAS-41 | MMAS-4-Ahmaric  MMAS-4-Arabic  MMAS-4-Chinese  MMAS-4-Afan Oromo  MMAS-4-Ewe  MMAS-4-French  MMAS-4-Ga  MMAS-4-German  MMAS-4-Indonesian  MMAS-4-Korean  MMAS-4-Khmer  MMAS-4-Maralayam  MMAS-4-Portugese  MMAS-4-Spanish  MMAS-4-Thai  MMAS-4-Turkish  MMAS-4-Twi |
| MMAS-8 | MIAS  MALMAS  MMAS-8 (Ethiopia)  MMAS-8 (Tanzania)  MMAS-8-Afan-Oromo  MMAS-8-Ahmaric  MMAS-8-Arabic  MMAS-8-Chinese  MMAS-8-Ewe  MMAS-8-Farsi  MMAS-8-French  MMAS-8-Indonesian  MMAS-8-Kannada  MMAS-8-Korean  MMAS-8-Malay  MMAS-8-Mandarin  MMAS-8-Persian  MMAS-8-Spanish  MMAS-8-Tamil  MMAS-8-Thai  MMAS-8-Tigrigna |
| SDSCA-Revised | SDSCA-MS  SDSCA-5-Item  SDSCA-11-Persian  SDSCA-Revised-Ahmaric  SDSCA-Revised-Hindi  SDSCA-Revised-Spanish  SDSCA-Revised-Turkish |
| SCI-Revised | SCI-Catalan  SCI-Spanish  SCI-Urdu |
| Voils-English | Voils-Chinese  Voils-Malay |

Notes:1MMAS-4 and MMAS-8 were divided into subcategories to provide a clearer representation of the large number of respective adaptations captured within this review

Abbreviations: ARMS, Adherence to refills and medication scale; ARMS-7-Turkish, Adherence to refills and medication scale 7-item Turkish version; ARMS-12, Adherence to refills and medication scale 12-item; ARMS-D, Adherence to refills and medication scale diabetes version; ARMS-K, Adherence to refills and medication scale Korean version; ASK-12, adherence starts with knowledge 12-item; ASK-20, adherence starts with knowledge 20-item; BrMQ, brief medicines questionnaire; BrMQ-Thai, brief medicines questionnaire Thai version; modified- BrMQ, modified brief medicines questionnaire; ; CRN, cost-related non-adherence; CRN-Spanish, cost-related non-adherence Spanish version; CRN-Vietnamese, cost-related non-adherence Vietnamese version; Demirtas-Turkish, Demirtas questionnaire Turkish version; GMAS-English, general adherence to medication scale English version; GMAS-Urdu, general medication adherence scale Urdu version; MARS-5, medication adherence rating scale 5-item; MARS-5-Portuguese, medication adherence rating scale 5-item Portuguese version; MARS-10-Farsi, medication adherence rating scale 10-item Farsi version; MARS-10-Persian, medication adherence rating scale 10-item Persian version; MARS-5-Arabic, medication adherence rating scale 5-item Arabic version; MARS-5-Chinese, medication adherence rating scale 5-item Chinese version; MARS-5-Dutch, medication adherence rating scale 5-item Dutch version; MTA- Portuguese, measurement of treatment adherence Portuguese version; MTA-Arabic, measurement of treatment adherence Arabic version; MTA-OAD, measurement of adherence to drug therapy in oral antidiabetics; MTA-OAD, measurement of adherence to drug therapy in insulin; MMAS-4, Morisky medication adherence scale 4-item; MMAS-4-Afan Oromo, Morisky medication adherence scale 4-item Afan Oromo version; MMAS-4-Ahmaric, Morisky medication adherence scale 4-item Ahmaric version ; MMAS-4-Arabic, Morisky medication adherence scale 4-item Arabic version; MMAS-4-Chinese, Morisky medication adherence scale 4-item Chinese version; MMAS-4-Ewe, Morisky medication adherence scale 4-item Ewe version; MMAS-4-French, Morisky medication adherence scale 4-item French version; MMAS-4-Ga, Morisky medication adherence scale 4-item Ga version; MMAS-4-German, Morisky medication adherence scale 4-item German version; MMAS-4-Indonesian, Morisky medication adherence scale 4-item Indonesian version; MMAS-4-K, Morisky medication adherence scale 4-item Korean version; MMAS-4-Khmer, Morisky medication adherence scale 4-item Khmer version; MMAS-4-Maralayam, Morisky medication adherence scale 4-item Malayalam version; MMAS-4-Portuguese, Morisky medication adherence scale 4-item Portuguese version; MMAS-4-Spanish, Morisky medication adherence scale 4-item Spanish version; ; MMAS-4-Thai, Morisky medication adherence scale 4-item Thai version; MMAS-4-Turkish, Morisky medication adherence scale 4-item Turkish version; MMAS-4-Twi, Morisky medication adherence scale 4-item Twi version; MMAS-8; Morisky medication adherence scale 8-item; MALMAS, Malaysian medication adherence scale; MIAS, Morisky medication adherence scale adapted to specify insulin adherence; MMAS-8 (Ethiopia), Morisky medication adherence scale 8-item Ethiopian version; MMAS-8 (Tanzania), Morisky medication adherence scale 8-item Tanzanian version; MMAS-8 Arabic, Morisky medication adherence scale 8-item Arabic version; MMAS-8-Afan Oromo, Morisky medication adherence scale 8-item Afan Oromo version; MMAS-8-Amharic, Morisky medication adherence scale 8-item Amharic version; MMAS-8-Arabic, Morisky medication adherence scale 8-item Arabic version; MMAS-8-Chinese, Morisky medication adherence scale 8-item Chinese version; MMAS-8-Ewe, Morisky medication adherence scale 8-item Ewe version, MMAS-8-Farsi, Morisky medication adherence scale 8-item Farsi version; MMAS-8-French, Morisky medication adherence scale 8-item French version; MMAS-8-Indonesian, Morisky medication adherence scale 8-item Indonesian version; MMAS-8-Kannada, Morisky medication adherence scale 8-item Kannada version; MMAS-8-Korean, Morisky medication adherence scale 8-item Korean; MMAS-8-Malay, Morisky medication adherence scale 8-item Malay version; MMAS-8-Mandarin, Morisky medication adherence scale 8-item Mandarin version; MMAS-8-Persian, Morisky medication adherence scale 8-item Persian version; MMAS-8-Spanish, Morisky medication adherence scale 8-item Spanish version, MTA- Portuguese, measurement of treatment adherence Portuguese version; MMAS-8-Tamil, Morisky medication adherence scale 8-item Tamil version; MMAS-8-Thai, Morisky medication adherence scale 8-item Thai version; MMAS-8-Tigrigna, Morisky medication adherence scale 8-item Tigrigna version; SDSCA-Revised, summary of diabetes self-care activities revised version; SDSCA-11-Persian, summary of diabetes self-care activities 11-item Persian version; SDSCA-5, summary of diabetes self-care activities 5-item; SDSCA-MS, summary of diabetes self-care activities medicines subscale; SDSCA-Revised-Amharic, summary of diabetes self-care activities revised Amharic version; SDSCA-Revised-Hindi, summary of diabetes self-care activities revised Hindi version; SDSCA-Revised-Spanish, summary of diabetes self-care activities revised Spanish version; SDSCA-Revised-Turkish, summary of diabetes self-care activities revised Turkish version; SCI-R, self-care inventory revised; SCI-Catalan, self-care inventory Catalan version; SCI-Spanish, self-care inventory Spanish version; SCI-Urdu, self-care inventory Urdu version; Voils-English, Voils questionnaire English version; Voils-Chinese, Voils questionnaire Chinese version; Voils-Malay, Voils questionnaire Malay version;
